# Supplementary material for: Multiple Developmental Defects in sox11a Mutant Zebrafish with Features of Coffin-Siris Syndrome
Source: PubMed Central journal article supplement (PMC7545714; doi:10.7150/ijbs.47510), 2020-10-03

**Figure S1: Primer sequence**

| Primer name         | Primer sequence ( 5'-3' )                                        | Primer function |
|---------------------|------------------------------------------------------------------|-----------------|
| <i>sox11a</i> -g1-F | TGTAATACGACTCACTATA<br>ggtcgctttatgtgccgg<br>GTTTTAGAGCTAGAAAT   | gRNA synthesis  |
| <i>sox11a</i> -g2-F | TGTAATACGACTCACTATA<br>ggctgtcttcaccagtct<br>GTTTTAGAGCTAGAAAT   |                 |
| <i>sox11b</i> -g1-F | TGTAATACGACTCACTATA<br>gggtcgtttgatgtggccgg<br>GTTTTAGAGCTAGAAAT |                 |
| <i>sox11b</i> -g2-F | TGTAATACGACTCACTATA<br>gggtcgtttgatgtggccgg<br>GTTTTAGAGCTAGAAAT |                 |
| gRNA-R              | AAAAAAAGCACCGACTCGGTGCCAC                                        |                 |
| <i>sox11a</i> -F    | ACTTCGCCTCCTCCGCGCAA                                             | real-time PCR   |
| <i>sox11a</i> -R    | AGCCCAGGCTGCCCTCGCTA                                             |                 |
| <i>sox11b</i> -F    | ATGGCTGACTACCCCGACT                                              |                 |
| <i>sox11b</i> -R    | GCTGCTTTGACACTTTTGC                                              |                 |
| <i>p2rx4b</i> -F    | CTTTGGAATCCGCTTTGACG                                             |                 |
| <i>p2rx4b</i> -R    | AGGTTAAGAAGGGCAAGAGC                                             |                 |
| <i>calhm2</i> -F    | GTGATTGAACGCCAGCTACA                                             |                 |
| <i>calhm2</i> -R    | TATGCCTCCTGCTGATAGCC                                             |                 |
| <i>mctp2b</i> -F    | CTCCAGAGTGCCCTCAGATA                                             |                 |
| <i>mctp2b</i> -R    | GCACCTTCACACAGACTGAT                                             |                 |
| <i>rcn3</i> -F      | ATAATGAAGCCCGGCATCTC                                             |                 |
| <i>rcn3</i> -R      | TTTGGTGAGATCCTCTCCGT                                             |                 |
| <i>s100a11</i> -F   | ACAAGCTTGGTCAAATCCCA                                             |                 |
| <i>s100a11</i> -R   | AGAACTCCATGAACGTCAGC                                             |                 |
| <i>chrm2a</i> -F    | TGAACGCCAGCTACAGTATG                                             |                 |
| <i>chrm2a</i> -R    | TCCTGCTGATAGCCAAGAGT                                             |                 |
| <i>slc8a4a</i> -F   | AAGAAGAGGTGGCCAAGATG                                             |                 |
| <i>slc8a4a</i> -R   | CAGCGCAAGGTTAGTCTTCT                                             |                 |
| <i>aldh7a1</i> -F   | GAAGAGTGTTCCGCTGGTTA                                             |                 |
| <i>aldh7a1</i> -R   | CAAACGCTCCTCCAATCTCA                                             |                 |
| <i>matn1</i> -F     | TTGCCAAGAAGCTGCAAATC                                             |                 |
| <i>matn1</i> -R     | CTCTTCGTCACAGCTTCCAA                                             |                 |
| <i>and1</i> -F      | CTGATCCGCAACAGGAGAAA                                             |                 |
| <i>and1</i> -R      | CTCTGCAACTCCGTCTTTGT                                             |                 |
| <i>crtap</i> -F     | AAATTTGGCCTCGACGATGA                                             |                 |
| <i>crtap</i> -R     | GGCATGAACTTCTGTTTGGC                                             |                 |
| <i>dlx4a</i> -F     | ATCCAGGAGCTTACCTACCC                                             |                 |

|                            |                                              |            |                 |
|----------------------------|----------------------------------------------|------------|-----------------|
| <i>dlx4a</i> -R            | CGTTCAGCCGTATTTCTCCA                         |            |                 |
| <i>twist1a</i> -F          | GTCAACATCCCCTAACGCA                          |            |                 |
| <i>twist1a</i> -R          | CTCCTTCCAGTGAGTTCAGC                         |            |                 |
| <i>twist1b</i> -F          | TTCTCGGTTTGGAGGATGGA                         |            |                 |
| <i>twist1b</i> -R          | AGCTCACGGTTTGACCATTT                         |            |                 |
| <i>sec23a</i> -F           | CCCGAGTATGAGAACTCCG                          |            |                 |
| <i>sec23a</i> -R           | CGTGCTCAGTGTCGATGTAG                         |            |                 |
| <i>osc</i> -F              | ATCAGCTGACACAGAAGCGA                         |            |                 |
| <i>osc</i> -R              | GGCGGTGATGATTCCAGACG                         |            |                 |
| <i>runx2a</i> -F           | GACCATGGTGGAGATCATAGC                        |            |                 |
| <i>runx2a</i> -R           | GGGTTCGTGAATACTGTGATTG                       |            |                 |
| <i>runx2b</i> -F           | AGAGCTTCACCCTGACGATTAC                       |            |                 |
| <i>runx2b</i> -R           | AGGTACGATGGGTATGTCTGGT                       |            |                 |
| <i>ctsk</i> -F             | GTAACGAGAGGGCACTGAC                          |            |                 |
| <i>ctsk</i> -R             | TTCCTTGTTGCAGTTTGGGT                         |            |                 |
| <i>entpd5a</i> -F          | TGAAGAGTGGAGCTTTGGTG                         |            |                 |
| <i>entpd5a</i> -R          | GATGCTGCTTCCCTTGACCT                         |            |                 |
| <i>coll1a1a</i> -F         | TCTGCTGGATCAGCTGGTAA                         |            |                 |
| <i>coll1a1a</i> -R         | CAATTTCTCCATTGCGACCAC                        |            |                 |
| <i>akt2</i> -F             | AAGAAGCTCGTTCACCCTT                          |            |                 |
| <i>akt2</i> -R             | GGTCTGTGCAGTGAATCAT                          |            |                 |
| <i>atp6v1h</i> -F          | CAGGTTATTGCCGTCGCA                           |            |                 |
| <i>atp6v1h</i> -R          | TGTTTACCACCCAGCTGTTC                         |            |                 |
| $\beta$ -actin-F           | ATGCCCTCGTGCTGTTTTC                          |            |                 |
| $\beta$ -actin-R           | GCCTCATCTCCACATAGGA                          |            |                 |
| Probe- <i>and1</i> -F      | GATGTACCTGCAGCACCTTG                         |            | Probe synthesis |
| Probe- <i>and1</i> -R      | TAATACGACTCACTATAGGG<br>CATACCCGACGAAACATTCA |            |                 |
| Probe- <i>crtap</i> -F     | CTTTTCCGTTTGCGTCC                            |            |                 |
| Probe- <i>crtap</i> -R     | TAATACGACTCACTATAGGG<br>ACTGCGTTCTTCAGGTCATT |            |                 |
| Probe- <i>sec23a</i> -F    | ACCAGCCTGCTGAGCTACTT                         |            |                 |
| Probe- <i>sec23a</i> -R    | TAATACGACTCACTATAGGG<br>TCCCTGCTAATGCCATTTTA |            |                 |
| Probe- <i>coll10a1a</i> -F | ACCAGCCTTACTCCGTGAAA                         |            |                 |
| Probe- <i>coll10a1a</i> -R | TAATACGACTCACTATAGGG<br>TCCAGGTTTCCCTGAAGGTC |            |                 |
| <i>sox11a</i> -HMRA-F1     | TGATGAAAGCGAATTCATGG                         | Genotyping |                 |
| <i>sox11a</i> -HMRA-R1     | CTGGAGACTGTTCCATGATC                         |            |                 |
| <i>sox11b</i> -HMRA-F1     | CGAGGAGAGCGAAATGATGGCTTG                     |            |                 |
| <i>sox11b</i> -HMRA-R1     | CGCATTTCATGGGTCGTTTGATGTG                    |            |                 |

**Figure S2: The conservation of *sox11* in various species.**

|               |                                   |                  |                                |                                    |                        |     |             |       |   |                  |              |                   |                    |       |             |           |        |     |     |     |
|---------------|-----------------------------------|------------------|--------------------------------|------------------------------------|------------------------|-----|-------------|-------|---|------------------|--------------|-------------------|--------------------|-------|-------------|-----------|--------|-----|-----|-----|
| zb sox11a     | QTDNS                             | TD.SMS           | EAT                            | SD                                 | S                      | F   | VS.....     | IN    | T | 82               |              |                   |                    |       |             |           |        |     |     |     |
| zb sox11b     | QTDHS                             | TESSVS           | EIT                            | TE                                 | S                      | M   | ACSPVP...   | PK    | T | 87               |              |                   |                    |       |             |           |        |     |     |     |
| medaka sox11a | HMDNS                             | TDGMS            | EAT                            | TE                                 | S                      | F   | ACSPVA...   | IN    | T | 87               |              |                   |                    |       |             |           |        |     |     |     |
| rat sox11     | QAESS                             | AESNLP           | DAL                            | TE                                 | G                      | F   | ACSPVALDESD |       | S | 90               |              |                   |                    |       |             |           |        |     |     |     |
| mice sox11    | QAESS                             | AESNLP           | DAL                            | TE                                 | G                      | F   | ACSPVALDESD |       | S | 90               |              |                   |                    |       |             |           |        |     |     |     |
| human sox11   | QAESL                             | AESNLP           | EAL                            | TE                                 | G                      | F   | ACSPVALDESD |       | S | 90               |              |                   |                    |       |             |           |        |     |     |     |
|               |                                   |                  |                                |                                    |                        |     |             |       |   |                  |              |                   |                    |       |             |           |        |     |     |     |
| zb sox11a     |                                   |                  | K                              |                                    | K                      | L   | SSS         | PSAP. | E | CSKT.....        | S            | S....             | S                  | P     | L           | ANKTGSKSS | 155    |     |     |     |
| zb sox11b     |                                   |                  | Q                              |                                    | K                      | L   | SSS         | PAVQ. | E | ISKS.....        | V            | AAA..             | G                  | A     | L           | PSKPGNITA | 162    |     |     |     |
| medaka sox11a |                                   |                  | K                              |                                    | K                      | L   | AS.         | SSAP. | E | CAKL.....        | A            | TP...             | S                  | S     | M           | K..       | SGSKS. | 157 |     |     |
| rat sox11     |                                   |                  | K                              |                                    | R                      | T   | PAA         | PSAGQ | D | SAAG.....        | A            | AAKGFG            |                    | A     | L           | APAG...KA | 165    |     |     |     |
| mice sox11    |                                   |                  | K                              |                                    | R                      | T   | PAA         | PSAGQ | D | SAAG.....        | A            | AAKGFG            |                    | A     | L           | APAG...KA | 165    |     |     |     |
| human sox11   |                                   |                  | K                              |                                    | R                      | M   | PSA         | PSASQ | E | SAAGGGGSAGGGAGGA |              | TSKGSS            |                    | G     | L           | APAAAGAKA | 180    |     |     |     |
|               |                                   |                  |                                |                                    |                        |     |             |       |   |                  |              |                   |                    |       |             |           |        |     |     |     |
| zb sox11a     | ...                               | SHGYGDEYAFK..... | ST                             | VSKTVHIKSEFTDEDD                   | DSEEDSRVVRVKEEEDP..... | IRA | 207         |       |   |                  |              |                   |                    |       |             |           |        |     |     |     |
| zb sox11b     | RASTQDCRFNVFT.....                | NL               | VTKS..                         | IKRELTDEDD                         | DDDDDDDEEDYEDE.....    | EH  | 213         |       |   |                  |              |                   |                    |       |             |           |        |     |     |     |
| medaka sox11a | ...AHSYGDDCVFK.....               | VA               | T....                          | VKSELTDDED                         | DYEEDYRMGIKRAEEER..... | LRP | 204         |       |   |                  |              |                   |                    |       |             |           |        |     |     |     |
| rat sox11     | GAGKAAQPGDCG.....                 | AG               | AAKCVFLDDDDDEEDDE              | ELQLRPKPDADDDDEPAHSHLLPPPAQQPPQLLR |                        | 235 |             |       |   |                  |              |                   |                    |       |             |           |        |     |     |     |
| mice sox11    | GAGKAAQPGDCA.....                 | AG               | AAKCVFLDDDDDEEDDE              | ELQLRPKPDADDDDEPAHSHLLPPPTQQPPQLLR |                        | 235 |             |       |   |                  |              |                   |                    |       |             |           |        |     |     |     |
| human sox11   | GAGKAAQSGDYGAGDDYVLGSLRVSGSGGGGAG | TVKCVFLDEDDDDDD  | ELQLQIKQEPDEEDEEPPHQQLLPQPGQ.. | PSQLLR                             |                        | 269 |             |       |   |                  |              |                   |                    |       |             |           |        |     |     |     |
|               |                                   |                  |                                |                                    |                        |     |             |       |   |                  |              |                   |                    |       |             |           |        |     |     |     |
| zb sox11a     | YNVAK                             | ST               | E.                             | M                                  | E                      | V   | .....       | NN    | Y | NF               | N.           | ITKQSTMY...       | S                  | ..... | VSPASSRSV   | T         | S      | SS  | A   | 275 |
| zb sox11b     | IRLHN                             | AA               | EH                             | M                                  | E                      | S   | HTSATH...   | GS    | F | NF               | N.           | ITKQSAAY...       | S                  | ..... | VSPASSFRSVS | S         | S      | SS  | S   | 290 |
| medaka sox11a | YNVAK                             | SA               | E.                             | M                                  | E                      | V   | S.....      | HN    | F | NI               | SKQSAASVS... | SSRSVSTSSSSSSSSSS | S                  | S     | SG          | A         | 282    |     |     |     |
| rat sox11     | YSVAK                             | AA               | PE                             | L                                  | D                      | V   | AGG.....    |       | Y | SF               | N.           | ITKQPPP.AP        | LSPASSRCVSTSSSS..  | G     | S           | G         | GA     | A   | 313 |     |
| mice sox11    | YSVAK                             | AA               | PE                             | L                                  | D                      | V   | AGG.....    |       | Y | SF               | N.           | ITKQPPP.AP        | LSPASSRCVSTSSSS..  | G     | S           | G         | GA     | A   | 313 |     |
| human sox11   | YNVAK                             | SA               | PE                             | L                                  | D                      | V   | AGATSGAGGGS |       | Y | SF               | N.           | ITKQHPPLAQ        | LSPASSRSVSTSSSSSSG | S     | G           | SG        | A      | 358 |     |     |
|               |                                   |                  |                                |                                    |                        |     |             |       |   |                  |              |                   |                    |       |             |           |        |     |     |     |
| zb sox11a     | LF                                | F                | FASSAQSS...E                   | SQ.NP                              | S                      | E   | E           | 353   |   |                  |              |                   |                    |       |             |           |        |     |     |     |
| zb sox11b     | LV                                | F                | LAAGSHTA...D                   | .N.TS                              | C                      | D   | D           | 367   |   |                  |              |                   |                    |       |             |           |        |     |     |     |
| medaka sox11a | LF                                | F                | FAPSAPGS...E                   | ...NS                              | S                      | D   | D           | 358   |   |                  |              |                   |                    |       |             |           |        |     |     |     |
| rat sox11     | MF                                | L                | FSQGAHSACEQP                   | AG.AA                              | S                      | D   | D           | 394   |   |                  |              |                   |                    |       |             |           |        |     |     |     |
| mice sox11    | MF                                | L                | FSQGAHSACEQP                   | AG.AA                              | S                      | D   | D           | 394   |   |                  |              |                   |                    |       |             |           |        |     |     |     |
| human sox11   | MF                                | L                | FSQSAHSASEQQ                   | GGAAA                              | S                      | D   | D           | 440   |   |                  |              |                   |                    |       |             |           |        |     |     |     |

**Figure S3: The second line of *sox11a*<sup>m/m</sup> mutant and *sox11b*<sup>m/m</sup> mutant**

A: The target site of *sox11a*<sup>m/m</sup> mutant line.

CTCGATAAACCCAGACTGGTGCAAGACAGCCACCGGACACATA  
 CTCGATAAACCCAGAC-----AGCCACCGGACACATA -11bp

B: The amino sequence of Sox11a

MVQQTDNSETDSMSREATDSDESEFMVSINPDWCKTAT  
 GHIKRPMNAFMVWSKIERRKIMEQSPDMHNAEISKRLG  
 KRWKMLKDSEKIPFIREAERLRLKHMADYPDYKYRPPK  
 KPKLDSSSKPSAPSPEKCSKTSKSSKKCPKLKANKTGSK  
 SSSHGYGDEYAFKSTKVSKTVHIKSEFTDEDDDDSEED  
 SRVVRVKEEEDPIRAYNVAKVPASPTLSSSTESEGASMYE  
 EVRNNRLYYNFNITKQSTMYPASVSPASSRSVSTSSSS  
 EDADDLLFDFSLNFASSAQSSSELGSQNPGNLSLSLVDKE  
 LESFSEGLGSHFEPDYCTPELSEMIAGDWLEANFSDLV  
 FTY\*

C: A frameshift mutation of *sox11a*<sup>m/m</sup> mutant

MVQQTDNSETDSMSREATDSDESEFMVSINPD SHRTHK  
 ATDERVHGVV\*

D: The target site of *sox11b*<sup>m/m</sup> mutant line.

GGTGCCACCGAAACCGACTGGTGCAAGACAGCCACCGGCCACAT  
GGTGCCACCGAAACCG--ACTGGTGCAAGACAGCCACCGGCCACAT -1bp

E: The amino sequence of Sox11b

MVQQTDHSETESSVSRETTDTEESEMMACSPVPPKPDW  
CKTATGHIKRPMNAFMetVWSKIERRKIMEQSPDMHNAEI  
SKRLGKRWKMLKDSEKIPFIREAERLRLQHMADYPDYK  
YRPKKKPKLDSSSKPAVQSPEKISKSVKAAAGKKCAKPK  
PSKPGNITARASTQDCRFNYVFTNLKVTKSIKRELTDDDE  
DDDDDDDDDDDEEDDYEDEEHIRLHNVPASPTLSSAAES  
EHGASMYEESRHTSATHGSRLFYNFKNITKQSAAYPASV  
SPASSFRSVSSSSSSSSSEDSDDLLVDFSLNLAAGSHTADL  
GNTSGNLCLSLVDKDLDSFSEGLGSHFEPDYCTPELS  
EMIAGDWLEANFSDLVFTY\*

F: A frameshift mutation of *sox11b*<sup>m/m</sup> mutant

MVQQTDHSETESSVSRETTDTEESEMMACSPVPPKPTGA  
RQPPATSNDP\*

Figure S4: The production process of *sox11a*<sup>m/m</sup>*sox11b*<sup>m/m</sup> double mutant.

|                                                           |                                                           |                                                           |                                                           |
|-----------------------------------------------------------|-----------------------------------------------------------|-----------------------------------------------------------|-----------------------------------------------------------|
| <i>sox11a</i> <sup>+/+</sup> <i>sox11b</i> <sup>+/+</sup> | <i>sox11a</i> <sup>+/+</sup> <i>sox11b</i> <sup>m/+</sup> | <i>sox11a</i> <sup>m/+</sup> <i>sox11b</i> <sup>+/+</sup> | <i>sox11a</i> <sup>m/+</sup> <i>sox11b</i> <sup>m/+</sup> |
| <i>sox11a</i> <sup>+/+</sup> <i>sox11b</i> <sup>m/+</sup> | <i>sox11a</i> <sup>+/+</sup> <i>sox11b</i> <sup>m/m</sup> | <i>sox11a</i> <sup>m/+</sup> <i>sox11b</i> <sup>m/+</sup> | <i>sox11a</i> <sup>m/+</sup> <i>sox11b</i> <sup>m/m</sup> |
| <i>sox11a</i> <sup>m/+</sup> <i>sox11b</i> <sup>+/+</sup> | <i>sox11a</i> <sup>m/+</sup> <i>sox11b</i> <sup>m/+</sup> | <i>sox11a</i> <sup>m/m</sup> <i>sox11b</i> <sup>+/+</sup> | <i>sox11a</i> <sup>m/m</sup> <i>sox11b</i> <sup>m/+</sup> |
| <i>sox11a</i> <sup>m/+</sup> <i>sox11b</i> <sup>m/+</sup> | <i>sox11a</i> <sup>m/+</sup> <i>sox11b</i> <sup>m/m</sup> | <i>sox11a</i> <sup>m/m</sup> <i>sox11b</i> <sup>m/+</sup> | <i>sox11a</i> <sup>m/m</sup> <i>sox11b</i> <sup>m/m</sup> |

Figure S5: The ratio of *sox11a*<sup>m/m</sup> mutant with curved spine (\*\*\*\**P*<0.0001).

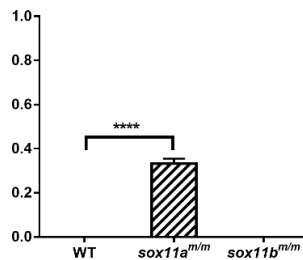

Figure S6: The expression level of *sox11a* in WT and *sox11b*<sup>m/m</sup> mutant (\**P*<0.05).

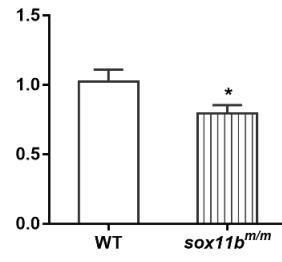

**Figure S7: The expression level of *sox11b* in WT and *sox11a<sup>m/m</sup>* mutant (\*\* $P < 0.01$ ).**

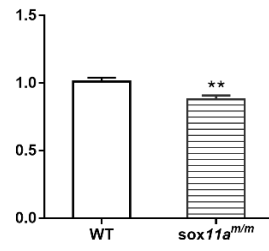

Supplement: ijbsv16p3039s1.pdf [file ijbsv16p3039s1.pdf]
